# Supplementary material for: Investigation of Bis(Perfluoro‐tert‐Butoxy) Halogenates(I/III)
Source: PubMed Central journal article supplement (PMC9298082; doi:10.1002/chem.202103325), 2021-11-05
Supplement: CHEM-27-17676-s001.pdf [file CHEM-27-17676-s001.pdf]

# Chemistry–A European Journal

Supporting Information

## **Investigation of Bis(Perfluoro-*tert*-Butoxy) Halogenates(I/III)**

Patrick Pröhm, Willi R. Berg, Susanne M. Rupf, Patrick Voßnacker, and Sebastian Riedel\*

## SUPPORTING INFORMATION

## Table of Contents

|                                         |    |
|-----------------------------------------|----|
| Low Temperature IR Setup                | 1  |
| IR Data                                 | 2  |
| Raman Data                              | 4  |
| [NEt <sub>3</sub> Me][IF <sub>6</sub> ] | 6  |
| Crystal Data                            | 7  |
| Computational Data                      | 11 |
| References                              | 15 |

## Low Temperature IR Setup

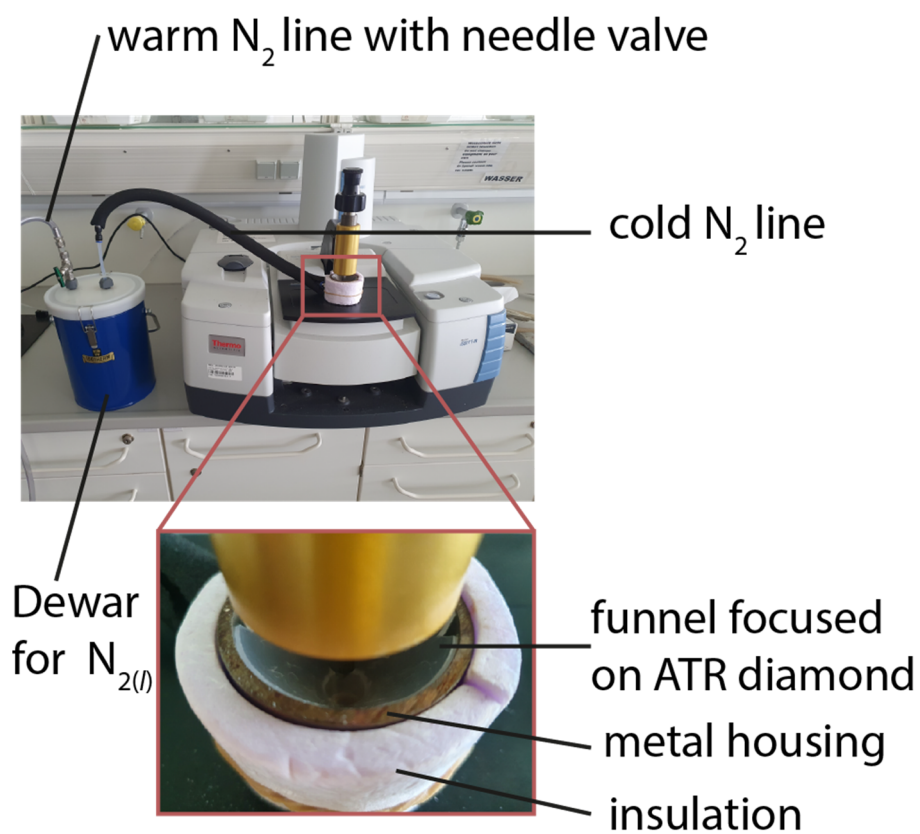

Figure S1. Experimental setup for measuring IR spectra at low temperatures.

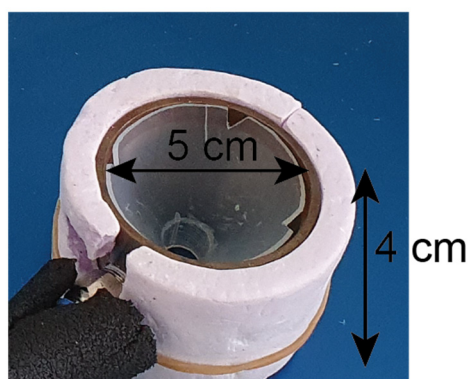

Figure S2. Experimental setup for measuring IR spectra at low temperatures.

## SUPPORTING INFORMATION

## Raman Data

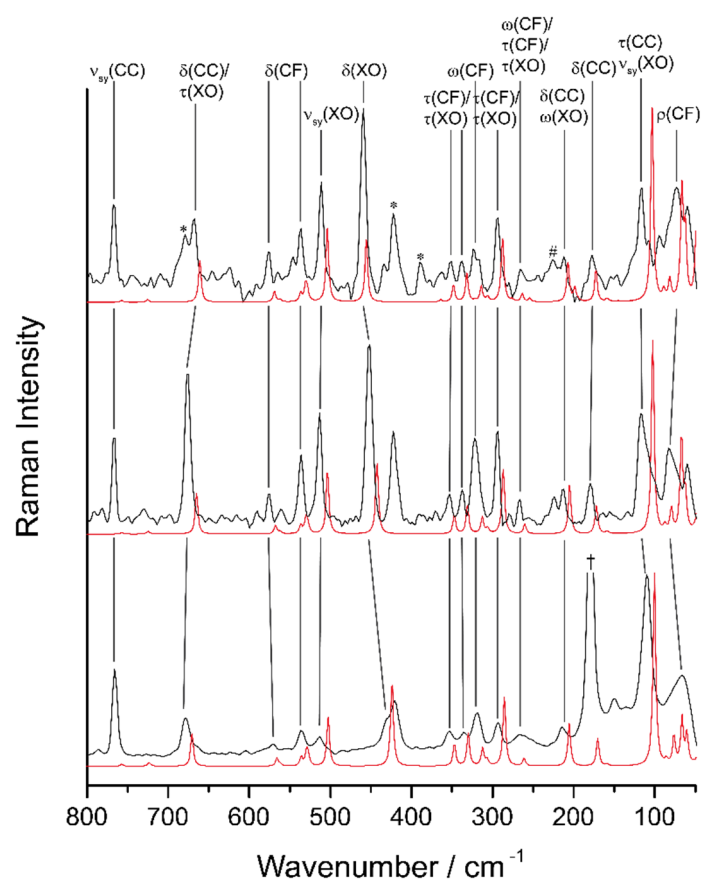

Figure S3. Raman spectra (1064 nm) of  $[\text{NEt}_4][\text{Cl}(\text{OC}_4\text{F}_9)_2]$  **1** (top, 77 K),  $[\text{NEt}_4][\text{Br}(\text{OC}_4\text{F}_9)_2]$  (middle, 77 K) and  $[\text{NEt}_4][\text{I}(\text{OC}_4\text{F}_9)_2]$  (bottom, 298 K). Experimental spectra (black), calculated spectra of the anion (red, B3LYP-D3BJ/def2-TZVPP). Asterisk highlights cation bands, hash denotes residual solvent bands of EtCN, dagger highlights iodine impurity.

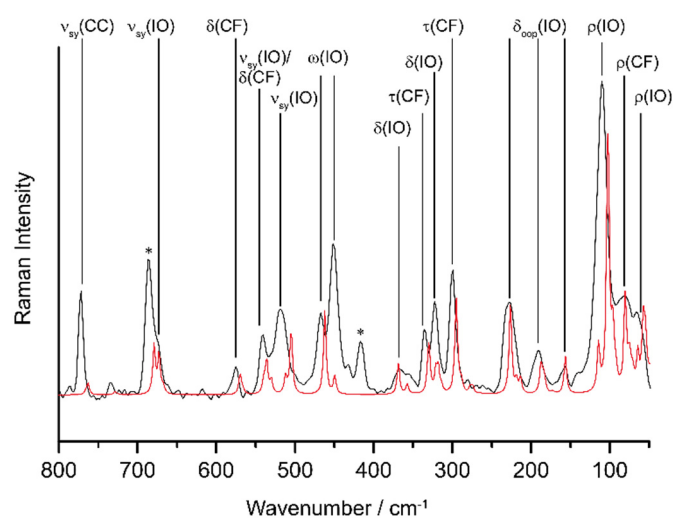

Figure S4. Raman spectrum (1064 nm, 298 K) of  $[\text{NEt}_4][\text{I}(\text{OC}_4\text{F}_9)_2]$ . Experimental spectrum (black), calculated spectrum of the anion (red, B3LYP-D3BJ/def2-TZVPP). Asterisk highlights cation bands.

## SUPPORTING INFORMATION

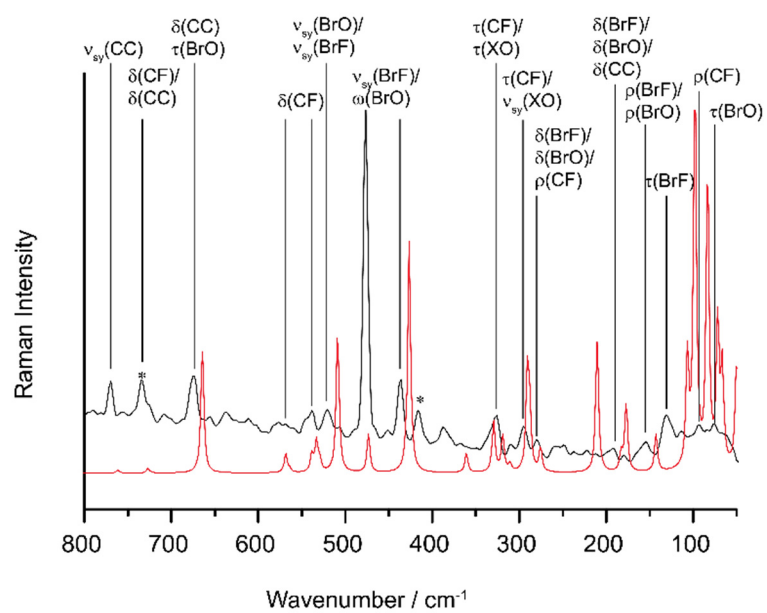

Figure S5. Raman spectrum (1064 nm, 77 K) of  $[\text{NEt}_4][\text{BrF}_2(\text{OC}_4\text{F}_9)_2]$ . Experimental spectrum (black), calculated spectrum of the anion (red, B3LYP-D3BJ/def2-TZVPP). Asterisk highlights cation bands.

## SUPPORTING INFORMATION

## IR Data

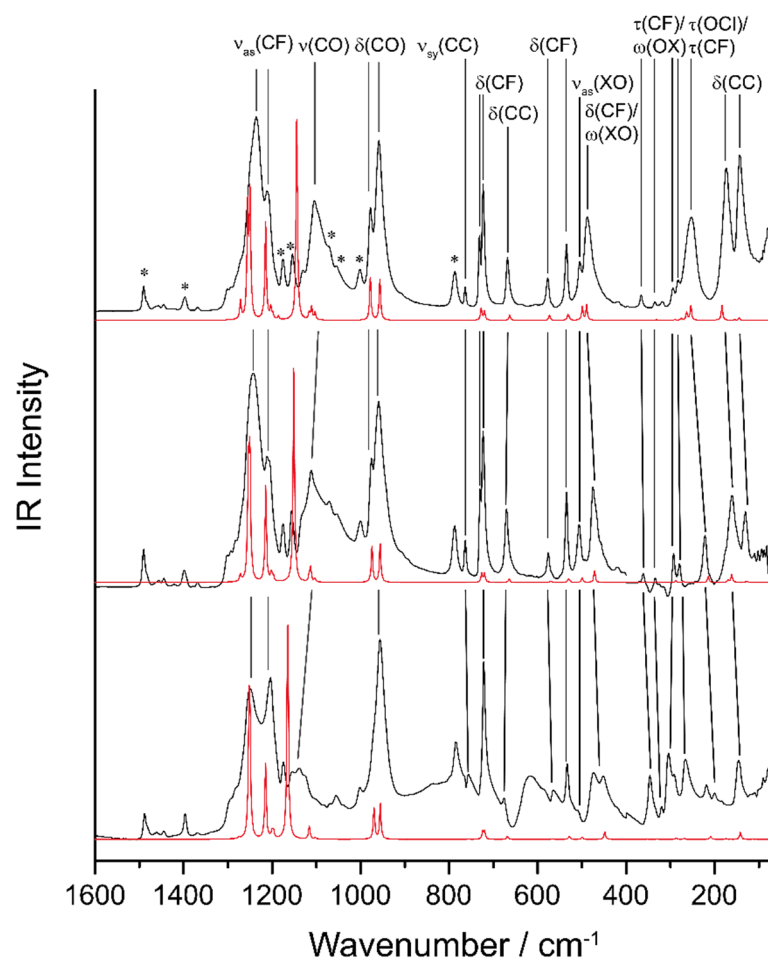

Figure S6. IR spectra (ATR) of  $[\text{NEt}_4][\text{Cl}(\text{OC}_4\text{F}_9)_2]$  (top, 233 K),  $[\text{NEt}_4][\text{Br}(\text{OC}_4\text{F}_9)_2]$  (middle 233 K) and  $[\text{NEt}_4][\text{I}(\text{OC}_4\text{F}_9)_2]$  (bottom, 298 K). Experimental spectra (black), calculated spectra of the anion (red). Discontinuity at  $400\text{ cm}^{-1}$  due to a different beam splitter. Bands highlighted with an asterisk correspond to the cation.

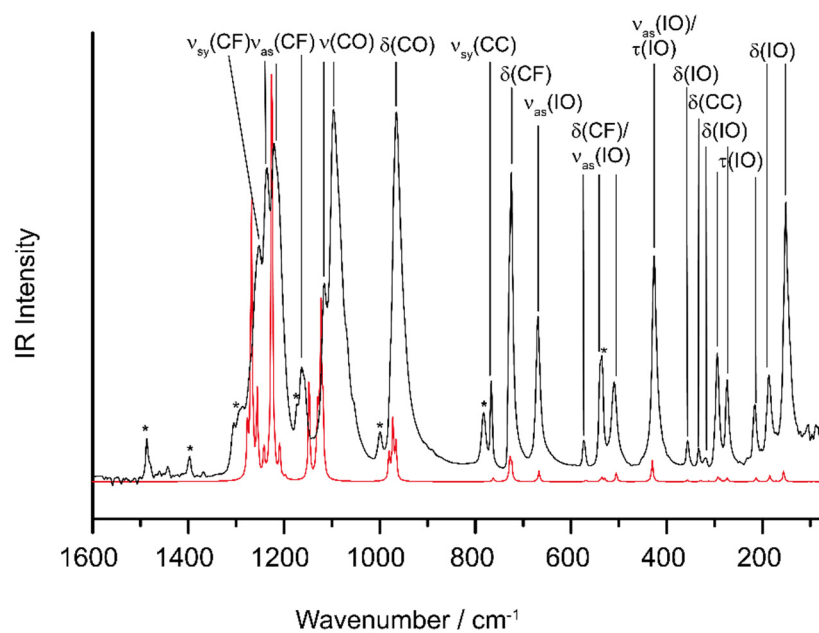

Figure S7. IR spectrum (ATR, 233 K) of  $[\text{NEt}_4][\text{I}(\text{OC}_4\text{F}_9)_4]$ . Experimental spectrum (black), calculated spectrum of the anion (red). Discontinuity at  $400\text{ cm}^{-1}$  due to a different beam splitter. Bands highlighted with an asterisk correspond to the cation.

## SUPPORTING INFORMATION

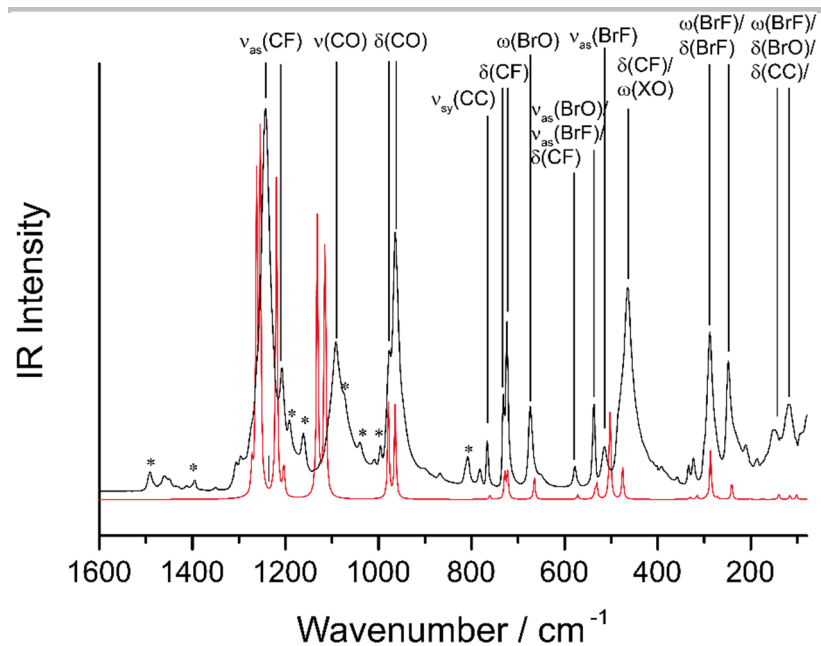

Figure S8. IR spectrum (ATR, 233 K) of  $[\text{NEt}_4][\text{BrF}_2(\text{OC}_6\text{F}_5)_2]$ . Experimental spectrum (black), calculated spectrum of the anion (red). Discontinuity at  $400 \text{ cm}^{-1}$  due to a different beam splitter. Bands highlighted with an asterisk correspond to the cation.

## SUPPORTING INFORMATION

**[NEt<sub>3</sub>Me][IF<sub>6</sub>] 6**

Analogous to the reactions of quaternary tetraalkylammonium chlorides<sup>[1]</sup> and bromides<sup>[2]</sup> the iodide salt [NEt<sub>3</sub>Me]I can be fluorinated using dilute fluorine (10 % in Ar) to yield the corresponding hexafluoroiodate(V) salt (eq. 1).

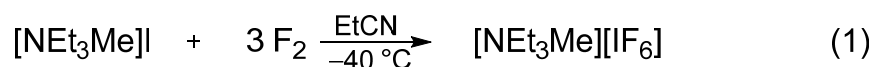

We were able to obtain single crystals by cooling the reaction mixture slowly to  $-80\text{ }^\circ\text{C}$  (Figure S7 and S8). As expected, the structure is largely in agreement with the known structure of [NMe<sub>4</sub>][IF<sub>6</sub>] which was synthesized from [NMe<sub>4</sub>]F and IF<sub>5</sub>.<sup>[3]</sup>

[NEt<sub>3</sub>Me]I (100 mg, 0.411 mmol, 1 eq) was dissolved in propionitrile (2 ml) and cooled to  $-40\text{ }^\circ\text{C}$ . Dilute fluorine (10 % in Ar, 20 ml min<sup>-1</sup>, 15 min, 1 eq) was bubbled through the reaction solution. Afterwards, Ar was bubbled through the solution for 15 min to remove any residual reactive gas. The reaction mixture was slowly cooled to  $-80\text{ }^\circ\text{C}$  and the product was obtained as a crystalline solid.

Raman (crystal, 1064 nm, 77 K)  $\tilde{\nu} / \text{cm}^{-1} = 3050, 3000, 2946, 1507, 1077, 1008, 961, 683, 628, 565, 496, 460, 386$ .

CCDC number: 2105587

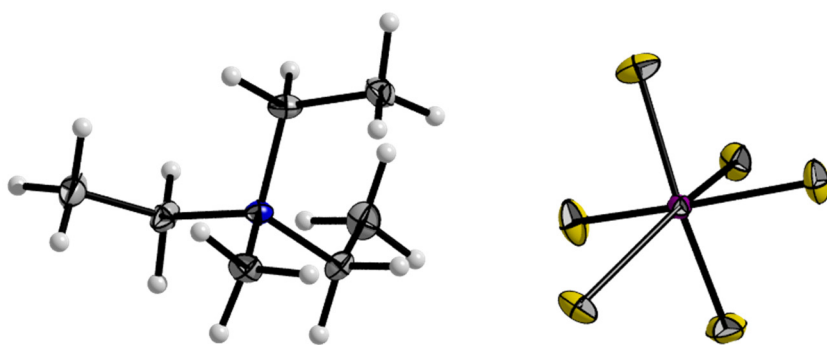

Figure S9. Solid-state structure of [NEt<sub>3</sub>Me][IF<sub>6</sub>]. Displacement ellipsoids are shown at 50 % probability level. Color code: yellow = fluorine, grey = carbon, purple = iodine, blue = nitrogen.

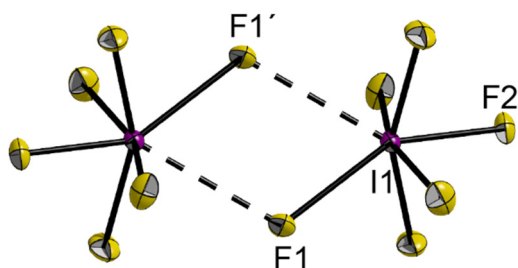

Figure S10. Solid-state structure of [NEt<sub>3</sub>Me][IF<sub>6</sub>] showing two bridged anions. Cations omitted for clarity. Displacement ellipsoids are shown at 50 % probability level. Color code: yellow = fluorine, purple = iodine. Selected bond lengths [pm]: I1-F1 222.4(2), I1-F2 186.6(2), I1-F1' 269.0(2).

## SUPPORTING INFORMATION

## Crystal Data

| Compound                                                     | 1                                                                 | 2                                                                 | 3                                                                |
|--------------------------------------------------------------|-------------------------------------------------------------------|-------------------------------------------------------------------|------------------------------------------------------------------|
| Identification code                                          | fullp21m_b                                                        | P21_twin_final                                                    | P2(1)_multiscan                                                  |
| Empirical formula                                            | C <sub>16</sub> H <sub>20</sub> ClF <sub>18</sub> NO <sub>2</sub> | C <sub>16</sub> H <sub>20</sub> BrF <sub>18</sub> NO <sub>2</sub> | C <sub>16</sub> H <sub>20</sub> F <sub>18</sub> INO <sub>2</sub> |
| Formula weight                                               | 635.78                                                            | 680.24                                                            | 727.23                                                           |
| Temperature/K                                                | 100                                                               | 100.0                                                             | 100                                                              |
| Crystal system                                               | monoclinic                                                        | monoclinic                                                        | monoclinic                                                       |
| Space group                                                  | <i>P</i> 2 <sub>1</sub>                                           | <i>P</i> 2 <sub>1</sub>                                           | <i>P</i> 2 <sub>1</sub>                                          |
| <i>a</i> /Å                                                  | 9.8030(5)                                                         | 9.9124(5)                                                         | 10.1009(6)                                                       |
| <i>b</i> /Å                                                  | 12.2085(7)                                                        | 12.0667(6)                                                        | 11.8498(7)                                                       |
| <i>c</i> /Å                                                  | 10.5701(4)                                                        | 10.5647(6)                                                        | 10.7012(5)                                                       |
| $\alpha$ /°                                                  | 90                                                                | 90                                                                | 90                                                               |
| $\beta$ /°                                                   | 113.137(2)                                                        | 112.206(2)                                                        | 111.355(2)                                                       |
| $\gamma$ /°                                                  | 90                                                                | 90                                                                | 90                                                               |
| Volume/Å <sup>3</sup>                                        | 1163.28(10)                                                       | 1169.92(11)                                                       | 1192.92(12)                                                      |
| Z                                                            | 2                                                                 | 2                                                                 | 2                                                                |
| $\rho_{\text{calc}}$ g/cm <sup>3</sup>                       | 1.815                                                             | 1.931                                                             | 2.025                                                            |
| $\mu$ /mm <sup>-1</sup>                                      | 0.324                                                             | 1.916                                                             | 1.499                                                            |
| F(000)                                                       | 636.0                                                             | 672.0                                                             | 708.0                                                            |
| Crystal size/mm <sup>3</sup>                                 | 0.938 × 0.521 × 0.517                                             | 0.59 × 0.23 × 0.19                                                | 0.353 × 0.167 × 0.143                                            |
| Radiation                                                    | MoK $\alpha$ ( $\lambda$ = 0.71073)                               | MoK $\alpha$ ( $\lambda$ = 0.71073)                               | MoK $\alpha$ ( $\lambda$ = 0.71073)                              |
| 2 $\theta$ range for data collection/°                       | 4.19 to 56.65                                                     | 4.164 to 56.612                                                   | 4.086 to 50.716                                                  |
| Index ranges                                                 | -13 ≤ <i>h</i> ≤ 13, -16 ≤ <i>k</i> ≤ 16, -14 ≤ <i>l</i> ≤ 13     | -13 ≤ <i>h</i> ≤ 13, -16 ≤ <i>k</i> ≤ 16, -14 ≤ <i>l</i> ≤ 14     | -12 ≤ <i>h</i> ≤ 12, -14 ≤ <i>k</i> ≤ 14, -12 ≤ <i>l</i> ≤ 11    |
| Reflections collected                                        | 53521                                                             | 5805                                                              | 20495                                                            |
| Independent reflections                                      | 5773 [R <sub>int</sub> = 0.0329, R <sub>sigma</sub> = 0.0182]     | 5805 [R <sub>int</sub> = 0.0, R <sub>sigma</sub> = 0.0309]        | 4350 [R <sub>int</sub> = 0.0553, R <sub>sigma</sub> = 0.0411]    |
| Data/restraints/parameters                                   | 5773/1/348                                                        | 5805/1/348                                                        | 4350/1/336                                                       |
| Goodness-of-fit on F <sup>2</sup>                            | 1.051                                                             | 1.019                                                             | 1.039                                                            |
| Final <i>R</i> indexes [ <i>I</i> ≥ 2 $\sigma$ ( <i>I</i> )] | R <sub>1</sub> = 0.0382, wR <sub>2</sub> = 0.1032                 | R <sub>1</sub> = 0.0381, wR <sub>2</sub> = 0.0886                 | R <sub>1</sub> = 0.0410, wR <sub>2</sub> = 0.1010                |
| Final <i>R</i> indexes [all data]                            | R <sub>1</sub> = 0.0407, wR <sub>2</sub> = 0.1049                 | R <sub>1</sub> = 0.0443, wR <sub>2</sub> = 0.0925                 | R <sub>1</sub> = 0.0510, wR <sub>2</sub> = 0.1075                |
| Largest diff. peak/hole / e Å <sup>-3</sup>                  | 0.79/-0.29                                                        | 0.65/-0.58                                                        | 1.91/-1.02                                                       |
| Flack parameter                                              | 0.41(9)                                                           | 0.481(15)                                                         | 0.33(5)                                                          |



## SUPPORTING INFORMATION

| Compound                                                     | <b>4</b>                                                                      | <b>5</b>                                                                     | <b>6</b>                                                                     |
|--------------------------------------------------------------|-------------------------------------------------------------------------------|------------------------------------------------------------------------------|------------------------------------------------------------------------------|
| Identification code                                          | P21_n                                                                         | I2_m                                                                         | P21_n                                                                        |
| Empirical formula                                            | C <sub>24</sub> H <sub>20</sub> F <sub>36</sub> INO <sub>4</sub>              | C <sub>16</sub> H <sub>20</sub> BrF <sub>20</sub> NO <sub>2</sub>            | C <sub>7</sub> H <sub>18</sub> F <sub>6</sub> IN                             |
| Formula weight                                               | 1197.31                                                                       | 718.24                                                                       | 357.12                                                                       |
| Temperature/K                                                | 100                                                                           | 100.0                                                                        | 100.0                                                                        |
| Crystal system                                               | monoclinic                                                                    | monoclinic                                                                   | monoclinic                                                                   |
| Space group                                                  | <i>P2<sub>1</sub>/n</i>                                                       | <i>I2/m</i>                                                                  | <i>P2<sub>1</sub>/n</i>                                                      |
| <i>a</i> /Å                                                  | 19.0494(7)                                                                    | 18.399(2)                                                                    | 8.3739(4)                                                                    |
| <i>b</i> /Å                                                  | 18.9420(5)                                                                    | 9.2277(9)                                                                    | 16.3141(8)                                                                   |
| <i>c</i> /Å                                                  | 20.5628(7)                                                                    | 6.9961(7)                                                                    | 9.6506(5)                                                                    |
| <i>α</i> /°                                                  | 90                                                                            | 90                                                                           | 90                                                                           |
| <i>β</i> /°                                                  | 96.6270(10)                                                                   | 95.600(4)                                                                    | 112.395(2)                                                                   |
| <i>γ</i> /°                                                  | 90                                                                            | 90                                                                           | 90                                                                           |
| Volume/Å <sup>3</sup>                                        | 7370.2(4)                                                                     | 1182.1(2)                                                                    | 1218.96(11)                                                                  |
| <i>Z</i>                                                     | 8                                                                             | 2                                                                            | 4                                                                            |
| $\rho_{\text{calc}}$ g/cm <sup>3</sup>                       | 2.158                                                                         | 2.018                                                                        | 1.946                                                                        |
| $\mu$ /mm <sup>-1</sup>                                      | 1.088                                                                         | 1.914                                                                        | 2.675                                                                        |
| <i>F</i> (000)                                               | 4640.0                                                                        | 708.0                                                                        | 696.0                                                                        |
| Crystal size/mm <sup>3</sup>                                 | 0.26 × 0.22 × 0.17                                                            | 0.37 × 0.33 × 0.3                                                            | 0.2 × 0.2 × 0.2                                                              |
| Radiation                                                    | MoK $\alpha$ ( $\lambda$ = 0.71073)                                           | MoK $\alpha$ ( $\lambda$ = 0.71073)                                          | MoK $\alpha$ ( $\lambda$ = 0.71073)                                          |
| 2 $\theta$ range for data collection/°                       | 4.532 to 52.764                                                               | 4.448 to 56.706                                                              | 4.994 to 56.636                                                              |
| Index ranges                                                 | -23 ≤ <i>h</i> ≤ 23, -23 ≤ <i>k</i> ≤ 23, -25 ≤ <i>l</i> ≤ 25                 | -24 ≤ <i>h</i> ≤ 24, -12 ≤ <i>k</i> ≤ 12, -9 ≤ <i>l</i> ≤ 9                  | -11 ≤ <i>h</i> ≤ 10, -21 ≤ <i>k</i> ≤ 21, -12 ≤ <i>l</i> ≤ 12                |
| Reflections collected                                        | 141718                                                                        | 12186                                                                        | 27477                                                                        |
| Independent reflections                                      | 15060 [ <i>R</i> <sub>int</sub> = 0.0524, <i>R</i> <sub>sigma</sub> = 0.0270] | 1561 [ <i>R</i> <sub>int</sub> = 0.0348, <i>R</i> <sub>sigma</sub> = 0.0213] | 3029 [ <i>R</i> <sub>int</sub> = 0.0255, <i>R</i> <sub>sigma</sub> = 0.0132] |
| Data/restraints/parameters                                   | 15060/0/1318                                                                  | 1561/0/116                                                                   | 3029/0/140                                                                   |
| Goodness-of-fit on <i>F</i> <sup>2</sup>                     | 1.006                                                                         | 1.159                                                                        | 1.217                                                                        |
| Final <i>R</i> indexes [ <i>I</i> > 2 $\sigma$ ( <i>I</i> )] | <i>R</i> <sub>1</sub> = 0.0319, <i>wR</i> <sub>2</sub> = 0.0714               | <i>R</i> <sub>1</sub> = 0.0268, <i>wR</i> <sub>2</sub> = 0.0683              | <i>R</i> <sub>1</sub> = 0.0190, <i>wR</i> <sub>2</sub> = 0.0461              |
| Final <i>R</i> indexes [all data]                            | <i>R</i> <sub>1</sub> = 0.0476, <i>wR</i> <sub>2</sub> = 0.0778               | <i>R</i> <sub>1</sub> = 0.0268, <i>wR</i> <sub>2</sub> = 0.0683              | <i>R</i> <sub>1</sub> = 0.0191, <i>wR</i> <sub>2</sub> = 0.0462              |
| Largest diff. peak/hole / e Å <sup>-3</sup>                  | 0.81/-0.61                                                                    | 0.42/-0.44                                                                   | 0.35/-1.28                                                                   |
| Flack parameter                                              | -                                                                             | -                                                                            | -                                                                            |

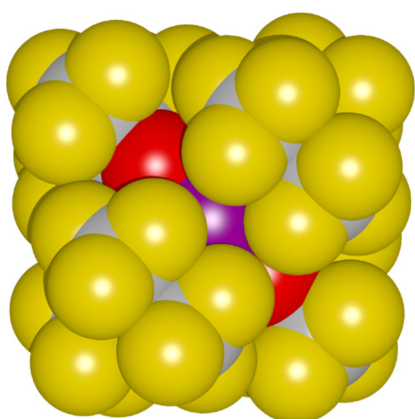

Figure S12. Space-filling representation of the anionic moiety of [NEt<sub>4</sub>][[(OC<sub>4</sub>F<sub>9</sub>)<sub>4</sub>] **4**, taken from its solid-state structure. Color code: yellow = fluorine, red = oxygen, purple = iodine.

## SUPPORTING INFORMATION

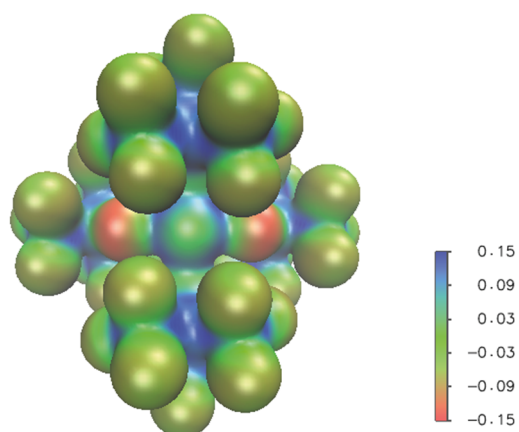

Figure S13. Electrostatic potential plotted in the electron density isosurface (iso = 0.025) of  $[\text{OC}_4\text{F}_9]^-$ .

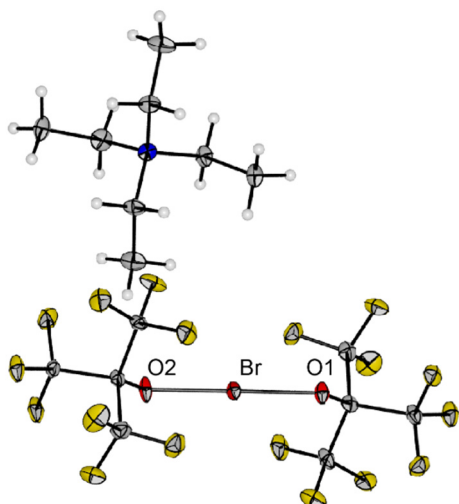

Figure S14. Molecular structure of  $[\text{NEt}_4][\text{Br}(\text{OC}_4\text{F}_9)_2]$  **2**. Displacement ellipsoids are shown at 50 % probability level. Color code: yellow = fluorine, grey = carbon, red = oxygen, dark red = bromine, blue = nitrogen. Selected bond lengths [pm] and angles [°]: Br-O1 205.1(4), Br-O2 204.9(4); O1-Br-O2-179.5(2).

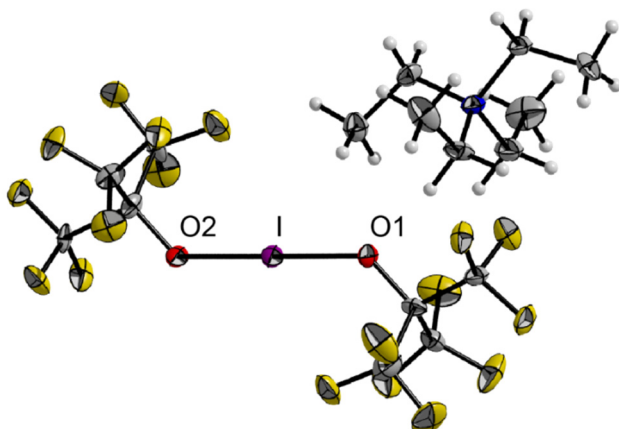

Figure S15. Molecular structure of  $[\text{NEt}_4][\text{I}(\text{OC}_4\text{F}_9)_2]$  **3**. Displacement ellipsoids are shown at 50 % probability level. Disorder in the cation omitted for clarity. Color code: yellow = fluorine, grey = carbon, red = oxygen, purple = iodine, blue = nitrogen. Selected bond lengths [pm] and angles [°]: I-O1 218.5(6), I-O2 218.0(6), O1-I-O2 179.8(3).

## SUPPORTING INFORMATION

The estimation of the thermochemical volume  $V_{therm}$  of the  $[I(OC_4F_9)_4]^-$  anion from the crystal structure was done according to a method presented by Passmore.<sup>[4]</sup> Firstly, the thermochemical volume of the counterion  $[NEt_4]^+$  was estimated from the crystal structure of  $[NEt_4]Cl$ <sup>[5]</sup>.

$$V([NEt_4]^+)_{therm} = \frac{\text{unit cell volume}}{Z} - V(Cl^-) = \frac{990.7}{4} - 25 = 223 \text{ \AA}^3$$

With this the thermochemical volume  $V_{therm}$  of the  $[I(OC_4F_9)_4]^-$  anion was estimated to  $699 \text{ \AA}^3$ .

$$V([I(OC_4F_9)_4]^-)_{therm} = \frac{\text{unit cell volume}}{Z} - V([NEt_4]^+) = \frac{7370.2}{8} - 223 = 698 \text{ \AA}^3$$

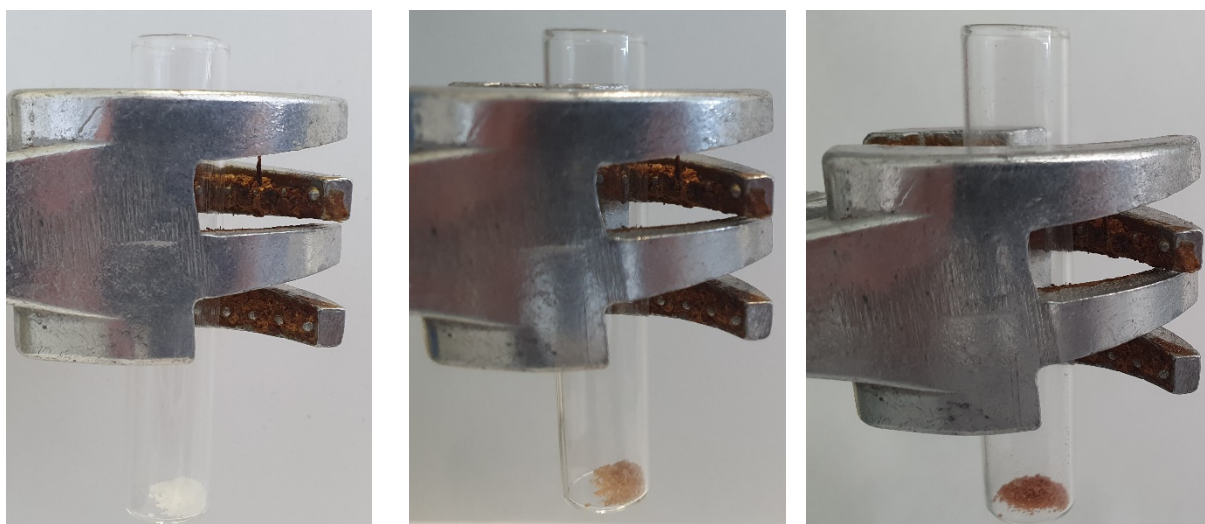

Figure S16. Photographs of the decomposition process of **4** at ambient atmosphere. Left: initial sample, middle: after 3.5 h, right: after 20 h. Increasingly dark color of the solid indicates formation of iodine.

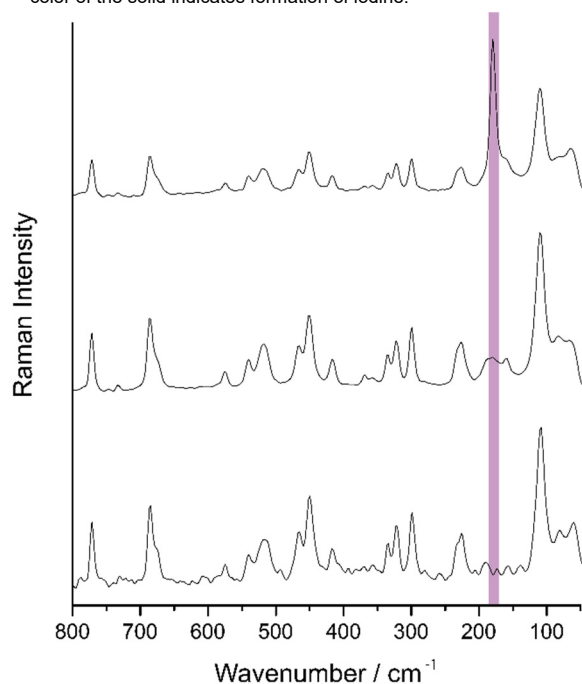

Figure S17. Raman spectra (1064 nm, 298 K) of the decomposition process of **4** at ambient atmosphere. bottom: initial sample, middle: after 3.5 h, top: after 20 h. Purple bar indicates formation of iodine.

## SUPPORTING INFORMATION

## Computational Data

NBO analysis:

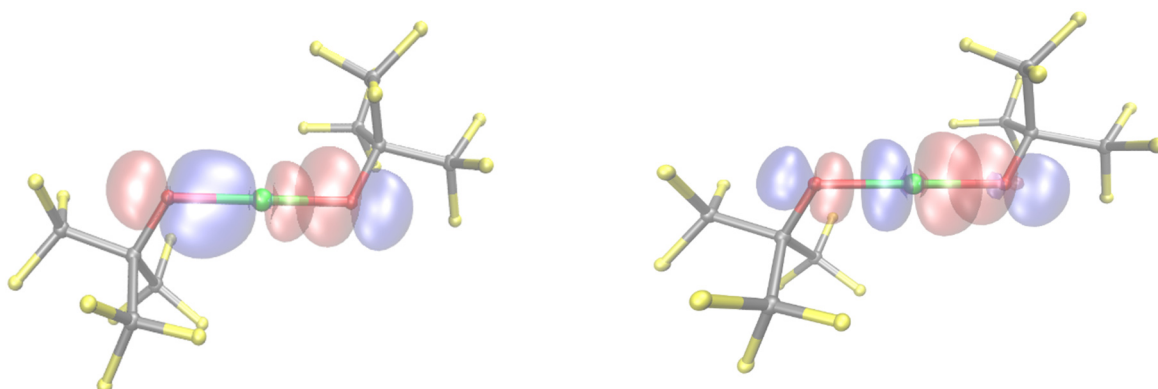

Figure S18. Results from the NBO analysis of  $[\text{Cl}(\text{OC}_4\text{F}_9)_2]^-$ . Left: NMOs of the O-Cl-O hyperbond. Right: Correlation between the oxygen lone pair and the  $\sigma^*(\text{Cl-O})$  NMO.

Figure S18 (left) shows the orbitals taking part in the 3-center-4-electron bond according to the NBO analysis for  $[\text{Cl}(\text{OC}_4\text{F}_9)_2]^-$ . The occupancy is 3.9 all three derivatives  $[\text{X}(\text{OC}_4\text{F}_9)_2]^-$ . Figure S18 (right) shows the correlation between the antibonding  $\sigma^*(\text{Cl-O})$  with the lone pair of the opposite oxygen atom. For  $[\text{Cl}(\text{OC}_4\text{F}_9)_2]^-$  the occupancy of  $\sigma^*(\text{Cl-O})$  which is mainly composed of p-type natural atomic orbitals is 0.38. For  $[\text{Br}(\text{OC}_4\text{F}_9)_2]^-$  the occupancy is 0.34 and for  $[\text{I}(\text{OC}_4\text{F}_9)_2]^-$  0.27. The  $\sigma^*(\text{X-O})$  orbital is mainly (Cl: 74%, Br: 79%, I 84%) composed of a p-type orbital of X.

NPA charges of neutral precursor species:

| Molecule | ClF   | ClOC <sub>4</sub> F <sub>9</sub> | BrOC <sub>4</sub> F <sub>9</sub> | IOC <sub>4</sub> F <sub>9</sub> | I(OC <sub>4</sub> F <sub>9</sub> ) <sub>3</sub> | IF <sub>3</sub> |
|----------|-------|----------------------------------|----------------------------------|---------------------------------|-------------------------------------------------|-----------------|
| NPA at X | +0.33 | +0.25                            | +0.34                            | +0.46                           | 1.65                                            | 1.73            |

Xyz coordinates of  $[\text{Br}(\text{OC}_4\text{F}_9)_2]^-$  optimized on B3LYP-D3BJ/def2-TZVPP:

29

Energy = -4826.751497174

```

Br  0.0010693  0.0127201 -0.0066797
F  -2.6646632  1.3074957 -3.2319725
F   3.8301136  1.3671272  3.6630571
F   4.2989331 -0.7649331  1.9857114
F  -2.2653308 -2.4413806 -0.2817040
F   2.3507356  2.7970357  2.9785983
F  -4.2257345 -1.9037999 -1.0239453
F   1.7480359  1.1050283  4.1752269
F  -2.5393345  1.6133139 -1.0996654
O   0.9695350  0.5984656  1.7449338
F  -1.7608547 -1.0656366 -4.1877347
F  -3.2008330 -0.6029086  0.3671572
F   3.2192564  0.5706322 -0.3617402
C  -2.9737767  0.7697044 -2.0372936
O  -0.9694993 -0.5704622 -1.7585113
F  -4.3237096  0.7380659 -1.9557791
F   4.2536542  1.8689460  1.0248017
C   2.5690661  1.4881897  3.1939618
F  -2.3234943 -2.7799184 -3.0033810
F  -3.8333876 -1.3688473 -3.6597706
F   2.5082474 -1.6181824  1.1205938
F   2.3088974  2.4309515  0.2597614
C  -2.3095348 -0.6512139 -1.8815783

```

## SUPPORTING INFORMATION

---

|   |            |            |            |
|---|------------|------------|------------|
| C | 3.0335636  | 1.3932592  | 0.6823965  |
| C | -3.0106539 | -1.4114909 | -0.6870993 |
| C | 2.3098049  | 0.6573853  | 1.8785341  |
| F | 2.6181406  | -1.2936645 | 3.2509998  |
| C | 2.9479623  | -0.7729737 | 2.0543096  |
| C | -2.5662086 | -1.4729086 | -3.2031881 |

Xyz coordinates of  $[\text{BrF}_2(\text{OC}_4\text{F}_9)_2]^-$  optimized on B3LYP-D3BJ/def2-TZVPP:

31

Energy = -5026.366342161

|    |            |            |            |
|----|------------|------------|------------|
| C  | -2.8898054 | 0.7101859  | -1.9143302 |
| C  | -2.3459683 | -0.7637351 | -1.8044037 |
| C  | -2.5552561 | -1.4814371 | -3.1940197 |
| F  | -3.7874935 | -1.2868168 | -3.7063569 |
| F  | -2.4012581 | 1.3145823  | -3.0053567 |
| F  | -2.5416036 | 1.4399662  | -0.8534549 |
| F  | -4.2377505 | 0.7549357  | -1.9994901 |
| O  | -1.0025552 | -0.8201842 | -1.5862474 |
| Br | 0.0008541  | 0.0005133  | -0.0019380 |
| O  | 1.0031595  | 0.8220860  | 1.5829530  |
| C  | 2.3459069  | 0.7640554  | 1.8039404  |
| C  | 2.8873607  | -0.7104342 | 1.9172203  |
| F  | 2.3959062  | -1.3122503 | 3.0083044  |
| C  | -3.1600582 | -1.5425255 | -0.7031691 |
| F  | -3.2460791 | -0.8209302 | 0.4240194  |
| F  | -2.5775859 | -2.7009230 | -0.4091027 |
| F  | -4.4256087 | -1.8165318 | -1.0968965 |
| C  | 2.5535189  | 1.4836430  | 3.1928539  |
| F  | 1.6716872  | 1.0471305  | 4.0942666  |
| F  | 3.7838674  | 1.2866902  | 3.7088592  |
| F  | 2.3823886  | 2.8091928  | 3.0714250  |
| C  | 3.1635316  | 1.5399443  | 0.7032529  |
| F  | 2.5827217  | 2.6982430  | 0.4052315  |
| F  | 3.2518705  | 0.8160887  | -0.4223977 |
| F  | 4.4282685  | 1.8137271  | 1.0997120  |
| F  | 4.2351472  | -0.7570296 | 2.0049514  |
| F  | 2.5400904  | -1.4413328 | 0.8568806  |
| F  | -1.6770185 | -1.0409773 | -4.0970719 |
| F  | -2.3802441 | -2.8066770 | -3.0753554 |
| F  | 0.3602261  | 1.5346641  | -1.0661960 |
| F  | -0.3582202 | -1.5338633 | 1.0619166  |

Xyz coordinates of  $[\text{Cl}(\text{OC}_4\text{F}_9)_2]^-$  optimized on B3LYP-D3BJ/def2-TZVPP:

29

Energy = -2712.843989505

|    |            |            |            |
|----|------------|------------|------------|
| C  | -3.1555319 | 0.8068693  | -1.6109068 |
| C  | -2.3003365 | -0.5150895 | -1.6777069 |
| C  | -2.6287097 | -1.2599176 | -3.0279459 |
| F  | -3.9491589 | -1.2967823 | -3.3100621 |
| F  | -3.0866670 | 1.4722704  | -2.7797429 |
| F  | -2.7085617 | 1.6288403  | -0.6612824 |
| F  | -4.4661506 | 0.5796830  | -1.3632436 |
| O  | -0.9757615 | -0.2558845 | -1.7228807 |
| C  | -2.7225698 | -1.4573525 | -0.4812155 |
| F  | -2.8803713 | -0.7698998 | 0.6593606  |
| F  | -1.7997570 | -2.3966411 | -0.2709437 |
| F  | -3.8957190 | -2.0932673 | -0.7155734 |
| F  | -2.0244171 | -0.6705724 | -4.0633994 |
| F  | -2.1968449 | -2.5319067 | -2.9848563 |
| Cl | -0.0102346 | 0.2623125  | -0.0786941 |
| O  | 0.9589950  | 0.8192657  | 1.5513204  |

## SUPPORTING INFORMATION

---

|   |           |            |            |
|---|-----------|------------|------------|
| C | 2.2946218 | 0.6401322  | 1.6408994  |
| C | 2.6703877 | -0.8610732 | 1.9384578  |
| F | 2.3090099 | -1.1987154 | 3.1909228  |
| C | 2.7544577 | 1.5263550  | 2.8610313  |
| F | 1.9223431 | 1.3897213  | 3.8971357  |
| F | 3.9928828 | 1.2222294  | 3.3061601  |
| F | 2.7626917 | 2.8277580  | 2.5246217  |
| C | 3.0853262 | 1.1195947  | 0.3590327  |
| F | 2.5358365 | 2.2239647  | -0.1485940 |
| F | 3.0905176 | 0.1825767  | -0.6002120 |
| F | 4.3817603 | 1.4053062  | 0.6287636  |
| F | 3.9971998 | -1.1052141 | 1.8317342  |
| F | 2.0447614 | -1.6945630 | 1.1078193  |

Xyz coordinates of  $[(OC_4F_9)_4]^-$  optimized on B3LYP-D3BJ/def2-TZVPP:

57

Energy = -4803.047330096

|   |            |            |            |
|---|------------|------------|------------|
| I | 0.0002818  | 0.0002934  | 0.0006938  |
| O | 0.0336657  | 0.0057754  | 2.1481943  |
| O | 2.1473199  | -0.0145156 | -0.0335196 |
| O | -0.0336918 | 0.0249478  | -2.1463905 |
| O | -2.1470894 | -0.0155321 | 0.0335331  |
| C | 2.9947216  | -1.0868966 | -0.0405149 |
| C | -0.0356127 | 1.1006438  | -2.9896255 |
| C | -2.9942989 | -1.0881862 | 0.0304107  |
| C | 0.0350578  | 1.0744567  | 3.0004351  |
| C | -0.0446265 | 0.4887126  | -4.4417994 |
| C | -1.3096693 | 2.0130889  | -2.8147947 |
| C | 1.2529256  | 1.9902205  | -2.8178365 |
| F | -1.2116066 | 3.1685315  | -3.5013141 |
| F | -2.4116802 | 1.3871120  | -3.2423191 |
| F | -1.4944218 | 2.3320215  | -1.5301228 |
| F | -0.3145352 | 1.4100452  | -5.3880128 |
| F | 1.1467271  | -0.0509860 | -4.7367275 |
| F | -0.9600502 | -0.4744620 | -4.5484366 |
| F | 1.4225664  | 2.8589000  | -3.8339455 |
| F | 1.1754783  | 2.7081204  | -1.6833421 |
| F | 2.3467592  | 1.2393339  | -2.7478058 |
| C | -4.4442707 | -0.4711756 | 0.0415445  |
| C | -2.8249032 | -1.9725788 | -1.2619608 |
| C | -2.8231957 | -2.0066628 | 1.3006903  |
| F | -3.5131747 | -3.1595354 | 1.1974260  |
| F | -1.5396696 | -2.3304028 | 1.4849660  |
| F | -3.2494609 | -1.3839603 | 2.4050865  |
| F | -5.3938438 | -1.3907418 | 0.3056737  |
| F | -4.5483018 | 0.4874214  | 0.9620926  |
| F | -4.7364993 | 0.0760358  | -1.1470278 |
| F | -3.8424355 | -2.8389495 | -1.4347846 |
| F | -2.7543499 | -1.2172013 | -2.3526842 |
| F | -1.6915247 | -2.6925902 | -1.1881980 |
| C | 4.4447670  | -0.4696953 | -0.0468079 |
| C | 2.8260801  | -1.9831217 | 1.2436842  |
| C | 2.8233040  | -1.9935091 | -1.3192380 |
| F | 3.5133141  | -3.1473147 | -1.2272279 |
| F | 1.5397293  | -2.3154362 | -1.5062006 |
| F | 3.2493456  | -1.3601228 | -2.4176040 |
| F | 5.3936835  | -1.3857480 | -0.3251080 |
| F | 4.5465614  | 0.5007557  | -0.9550250 |
| F | 4.7399022  | 0.0619437  | 1.1481567  |
| F | 3.8442087  | -2.8505101 | 1.4078270  |
| F | 2.7554926  | -1.2379445 | 2.3414903  |

## SUPPORTING INFORMATION

---

|   |            |            |           |
|---|------------|------------|-----------|
| F | 1.6930411  | -2.7029836 | 1.1637311 |
| C | 0.0413365  | 0.4508600  | 4.4475575 |
| C | 1.3103684  | 1.9871723  | 2.8352431 |
| C | -1.2524064 | 1.9664077  | 2.8335675 |
| F | 0.3104926  | 1.3647873  | 5.4011958 |
| F | -1.1508279 | -0.0901962 | 4.7366212 |
| F | 0.9558222  | -0.5138675 | 4.5480505 |
| F | 1.2107346  | 3.1389956  | 3.5275083 |
| F | 2.4104198  | 1.3580356  | 3.2635708 |
| F | 1.5001154  | 2.3127651  | 1.5530840 |
| F | -1.4223699 | 2.8284191  | 3.8552072 |
| F | -1.1726514 | 2.6917757  | 1.7039430 |
| F | -2.3470545 | 1.2172483  | 2.7571895 |

Xyz coordinates of  $[\text{OC}_4\text{F}_9]^-$  optimized on B3LYP-D3BJ/def2-TZVPP:

14

Energy = -1126.383048342

|   |            |            |            |
|---|------------|------------|------------|
| O | 0.1606553  | 0.1243953  | -1.8147659 |
| C | 0.0471858  | 0.0365452  | -0.5346221 |
| C | 1.4638150  | 0.1138407  | 0.2033967  |
| C | -0.6306575 | -1.3390026 | -0.0823163 |
| C | -0.8504350 | 1.2118307  | 0.0732536  |
| F | 2.1545307  | -1.0400533 | 0.0489035  |
| F | 2.2244482  | 1.0860201  | -0.3252964 |
| F | 1.4232129  | 0.3505025  | 1.5459543  |
| F | -0.5041534 | -1.6585331 | 1.2376013  |
| F | -0.1167314 | -2.3724414 | -0.7686542 |
| F | -1.9597553 | -1.3317953 | -0.3386093 |
| F | -0.1765178 | 2.3857558  | 0.0729372  |
| F | -1.9513577 | 1.4051529  | -0.6709560 |
| F | -1.2842400 | 1.0277825  | 1.3531737  |

Xyz coordinates of  $\text{ClOC}_4\text{F}_9$  optimized on B3LYP-D3BJ/def2-TZVPP:

15

Energy = -1586.409178232

|    |            |            |            |
|----|------------|------------|------------|
| C  | 0.7394859  | 0.0431451  | 1.3047987  |
| F  | 1.3636821  | -1.1401044 | 1.3086897  |
| C  | -0.1179315 | 0.2222003  | 0.0032407  |
| C  | 0.7022606  | -0.1983228 | -1.2713965 |
| F  | 0.7265311  | -1.5286733 | -1.4036421 |
| F  | -0.0424247 | 0.1131604  | 2.3865405  |
| F  | 1.6620711  | 1.0017873  | 1.4080856  |
| C  | -1.4293954 | -0.6512033 | 0.0961645  |
| F  | -2.0076899 | -0.7404558 | -1.1044666 |
| O  | -0.6539266 | 1.5208972  | -0.0835057 |
| Cl | 0.3903483  | 2.7894225  | -0.5477707 |
| F  | -1.1515634 | -1.8841156 | 0.5263841  |
| F  | -2.3032596 | -0.1003982 | 0.9355823  |
| F  | 1.9678446  | 0.2276773  | -1.1915098 |
| F  | 0.1539674  | 0.3249832  | -2.3671945 |

Xyz coordinates of  $\text{BrOC}_4\text{F}_9$  optimized on B3LYP-D3BJ/def2-TZVPP:

15

Energy = -3700.305358691

|   |            |            |            |
|---|------------|------------|------------|
| C | 0.7361939  | 0.0318509  | 1.3053324  |
| F | 1.3604706  | -1.1513770 | 1.3109693  |
| C | -0.1211994 | 0.2172687  | 0.0044934  |
| C | 0.6988836  | -0.2120028 | -1.2672873 |
| F | 0.7273613  | -1.5419986 | -1.3974516 |
| F | -0.0432753 | 0.1041231  | 2.3886638  |
| F | 1.6612267  | 0.9904200  | 1.4076474  |

SUPPORTING INFORMATION

---

|    |            |            |            |
|----|------------|------------|------------|
| C  | -1.4323093 | -0.6596866 | 0.0979541  |
| F  | -2.0120646 | -0.7472290 | -1.1025533 |
| O  | -0.6514586 | 1.5099078  | -0.0808484 |
| Br | 0.4197796  | 2.9396219  | -0.5759753 |
| F  | -1.1539431 | -1.8944066 | 0.5249985  |
| F  | -2.3062258 | -0.1127821 | 0.9395004  |
| F  | 1.9646158  | 0.2184076  | -1.1890526 |
| F  | 0.1519447  | 0.3078828  | -2.3663909 |

**References**

- [1] P. Pröhm, J. R. Schmid, K. Sonnenberg, S. Steinhauer, C. J. Schattenberg, R. Müller, M. Kaupp, P. Voßnacker, S. Riedel, *Angew. Chem. Int. Ed.* **2020**, *59*, 16002.
- [2] J. R. Schmid, P. Pröhm, P. Voßnacker, G. Thiele, M. Ellwanger, S. Steinhauer, S. Riedel, *Eur. J. Inorg. Chem.* **2020**, *2020*, 4497.
- [3] A. R. Mahjoub, K. Seppelt, *Angew. Chem. Int. Ed.* **1991**, *30*, 323.
- [4] T. S. Cameron, I. Krossing, J. Passmore, *Inorg. Chem.* **2001**, *40*, 4488.
- [5] Y. Yan, J. T. Mague, J. P. Donahue, *CCDC 741550: Experimental Crystal Structure Determination*, Cambridge Crystallographic Data Centre, **2009**.
